# Supplementary material for: Randomised control trial of a proactive intervention supporting recovery in relation to stress and irregular work hours: effects on sleep, burn-out, fatigue and somatic symptoms
Source: HighWire-hosted journal article supplement (doi:10.1136/oemed-2021-107789), 2022-01-24
Supplement: oemed-2021-107789supp002_data_supplement.pdf [file oemed-2021-107789supp002_data_supplement.pdf]

Supplementary table 2. Independent t-test and chi-square test of differences between intervention and control groups at baseline

|                                | t/ $\chi^2$     | df  | P     |
|--------------------------------|-----------------|-----|-------|
| <b>Background information</b>  |                 |     |       |
| Age                            | t= 0.745        | 198 | 0.457 |
| Gender                         | $\chi^2= 0.18$  | 1   | 0.18  |
| Months of employment           | t= -1.351       | 205 | 0.178 |
| Medication (yes/no)*           | $\chi^2= 0.889$ | 1   | 0.502 |
| Sleep medications <sup>#</sup> | t= -0.668       | 81  | 0.506 |
| Sedatives <sup>#</sup>         | t= -1.205       | 80  | 0.232 |
| Opioid analgesics <sup>#</sup> | t= 0.102        | 80  | 0.919 |
| Other painkillers <sup>#</sup> | t= -0.066       | 83  | 0.947 |
| <b>Primary outcomes</b>        |                 |     |       |
| ISI <sup>^</sup>               | t= -0.095       | 201 | 0.924 |
| KSQ                            | t= 0.293        | 204 | 0.77  |
| SMBM Global                    | t= 0.157        | 199 | 0.875 |
| SMBM Fatigue                   | t= -0.323       | 199 | 0.747 |
| SMBM Cognitive                 | t= 0.699        | 199 | 0.485 |
| WIPL                           | t= 0.89         | 201 | 0.375 |
| SSS8                           | t= -0.364       | 154 | 0.716 |
| <b>Secondary outcomes</b>      |                 |     |       |
| PSS10                          | t= 0.702        | 189 | 0.483 |
| SMBM Listlessness              | t= -0.324       | 199 | 0.746 |
| SMBM Tense                     | t= 0.464        | 199 | 0.643 |
| DBAS                           | t= 1.056        | 203 | 0.292 |

\*45 % used medication.

<sup>#</sup> 1 never, 5 every day. The prevalence of using medication every week (4) or every day (5) were for sleep medication 6 %; central stimulants 0 %; sedatives 2 %; opioid analgesics 2 %; other pain killers 26 %.

<sup>^</sup>About one fifth (22 %) of the participants had clinical insomnia problems.

ISI- Insomnia Severity Index, 0-28 severe problems; KSQ - Karolinska Sleep Questionnaire, 1 always - 6 never; SMBQ - Shirom-Melamed Burnout, 1 almost never - 7 almost always; WIPL - Work Interference with Personal Life, 1 not at all - 5 almost all the time; SSS8 - Somatic Symptom Scale-8, 0-32 very high somatic symptom burden; PSS - Perceived Stress Scale, (0 never - 4 very often); DBAS - Dysfunctional Beliefs and Attitudes about Sleep, 0 do not agree - 10 do fully agree.
